# Supplementary material
Source: Elsevier journal article supplement (https://www.sciencedirect.com/science/article/pii/S0210569117302851)
Supplement: mmc2 [file S0210569117302851:mmc2.docx]

**ARTÍCULO ESPECIAL**

**Autores:** Vicente Gómez Tello(a), Javier Ruiz Moreno(b)*, Manfred Weiss(c), Eduardo González Marín (d), Paz Merino de Cos(e), Nieves Franco Garrobo(f), Angela Alonso Ovies(g), Juan Carlos Montejo González(h), Thomas Iber(i), Gernot Marx(j), Virgilio Córcoles González(k), Federico Gordo Vidal(l), Eduardo Palencia Herrejón(m), Juan Roca Guiseris(n), en nombre de la Sociedad Española de Medicina Intensiva y del German Board of Anesthesiologists

.

1. Servicio de Medicina Intensiva. Hospital Moncloa. Madrid.
2. Servicio de Medicina Intensiva . Hospital Universitari Sagrat Cor. Barcelona.
3. Klinik für Anästhesiologie. Universitätsklinikum. Ulm. República Federal de Alemania.
4. Servicio de Urgencias. Hospital Universitari Sagrat Cor. Barcelona.
5. Servicio de Medicina Intensiva . Hospital de Can Misses. Ibiza.
6. Servicio de Medicina Intensiva . Hospital Universitario de Móstoles. Madrid.
7. Servicio de Medicina Intensiva. Hospital Universitario de Fuenlabrada. Madrid.
8. Servicio de Medicina Intensiva. Hospital 12 de Octubre. Madrid.
9. Stadtklinik Baden-Baden und des Kreiskrankenhauses Bühl, Institut f. Anästhesiologie und Intensivmedizin. Baden-Baden. República Federal de Alemania.
10. Klinik für Operative Intensivmedizin und Intermediate Care. Aachen. República Federal de Alemania.
11. Servicio de Medicina Intensiva . Complejo Hospitalario Universitario de Albacete. Albacete
12. Servicio de Medicina Intensiva. Hospital Universitario del Henares. Coslada. Madrid.
13. Servicio de Medicina Intensiva. Hospital Infanta Leonor. Madrid
14. Servicio de Medicina Intensiva. Hospital Virgen de las Nieves. Granada

*Autor de correspondencia: Javier Ruiz Moreno

Correo electrónico: javiruiz@wanadoo.es
